# Supplementary material for: Tailoring Pectin-PLA Bilayer Film for Optimal Properties as a Food Pouch Material
Source: MDPI journal article supplement (doi:10.3390/polym16050712), 2024-03-05
Supplement: s1 [file s1]

Table S1. The recommended solution for optimized condition of pectin/PLA bilayer film

| Number | PLA<br>(g, w/v) | Pectin<br>(g, w/v) | Desirability    |
|--------|-----------------|--------------------|-----------------|
| 1      | <u>2.90</u>     | <u>1.96</u>        | <u>0.85</u>     |
|        |                 |                    | <u>Selected</u> |

Table S2. The acceptable range and validation results for optimized pectin/PLA bilayer film

| Test                    | Predictions              | 95% CI                      |                             | 95% PI                      |                          | Validation                                          |
|-------------------------|--------------------------|-----------------------------|-----------------------------|-----------------------------|--------------------------|-----------------------------------------------------|
|                         |                          | Low                         | High                        | Low                         | High                     | Experimental value                                  |
| <b>TS (mPa)</b>         | 6.76                     | 6.31                        | 7.22                        | 5.57                        | 7.96                     | 7.038 ± 0.69                                        |
| <b>EAB (%)</b>          | 428.38                   | 402.52                      | 454.24                      | 360.94                      | 495.82                   | 462.633 ± 137.95                                    |
| <b>WVP<br/>(g/msPa)</b> | 1.55 x 10 <sup>-10</sup> | 1.27 x<br>10 <sup>-10</sup> | 1.82 x<br>10 <sup>-10</sup> | 8.34 x<br>10 <sup>-11</sup> | 2.26 x 10 <sup>-10</sup> | 1.45 x 10 <sup>-10</sup> ± 4.58 x 10 <sup>-11</sup> |
| <b>OP (g/ms)</b>        | 9.62 x 10 <sup>-8</sup>  | 6.65 x<br>10 <sup>-8</sup>  | 1.26 x<br>10 <sup>-7</sup>  | 1.87 x<br>10 <sup>-8</sup>  | 1.74 x 10 <sup>-7</sup>  | 2.79 x 10 <sup>-7</sup> ± 9.20 x 10 <sup>-8</sup>   |
| <b>Solubility (%)</b>   | 26.83                    | 24.58                       | 29.06                       | 20.99                       | 32.65                    | 23.53 ± 5.20                                        |

\* CI = confidence interval; PI = prediction interval; TS = Tensile strength; EAB = Elongation at break; WVP = Water vapor permeability, OP = Oxygen permeability

Table S3. Light transmission properties of optimized bilayer film as comparison to single film layer

| Wavelength (nm)             | 200                      | 280                      | 350                      | 400                      | 500                      | 600                      | 700                      | 800                      | Opacity (A.mm <sup>-1</sup> ) |
|-----------------------------|--------------------------|--------------------------|--------------------------|--------------------------|--------------------------|--------------------------|--------------------------|--------------------------|-------------------------------|
| <b>Optimized pectin/PLA</b> | 0.38 ± 0.02 <sup>a</sup> | 1.66 ± 0.03 <sup>a</sup> | 3.18 ± 0.03 <sup>a</sup> | 1.53 ± 0.22 <sup>a</sup> | 0.89 ± 0.13 <sup>a</sup> | 1.22 ± 0.29 <sup>a</sup> | 0.84 ± 0.06 <sup>a</sup> | 0.88 ± 0.01 <sup>a</sup> | 21.08 ± 5.51 <sup>a</sup>     |
| <b>Pectin</b>               | 0.43 ± 0.05 <sup>a</sup> | 1.47 ± 0.01 <sup>b</sup> | 2.36 ± 0.12 <sup>b</sup> | 0.73 ± 0.04 <sup>c</sup> | 0.41 ± 0.01 <sup>b</sup> | 0.27 ± 0.00 <sup>b</sup> | 0.23 ± 0.01 <sup>b</sup> | 0.24 ± 0.01 <sup>c</sup> | 3.84 ± 0.03 <sup>b</sup>      |
| <b>PLA</b>                  | 0.22 ± 0.06 <sup>b</sup> | 0.77 ± 0.02 <sup>c</sup> | 1.51 ± 0.02 <sup>c</sup> | 1.16 ± 0.00 <sup>b</sup> | 0.77 ± 0.00 <sup>a</sup> | 0.42 ± 0.00 <sup>b</sup> | 0.23 ± 0.01 <sup>b</sup> | 0.34 ± 0.00 <sup>b</sup> | 1.82 ± 0.07 <sup>b</sup>      |

Table S4. Biodegradability rate of optimized bilayer film as comparison to single film layer over 2 weeks period

| Biodegradation rate (%) | 0 day                                                                                     | 3 days                                                                                                    | 7 days                                                                                                     | 14 days                                                                                                    |
|-------------------------|-------------------------------------------------------------------------------------------|-----------------------------------------------------------------------------------------------------------|------------------------------------------------------------------------------------------------------------|------------------------------------------------------------------------------------------------------------|
| Optimized pectin/PLA    | 0%<br>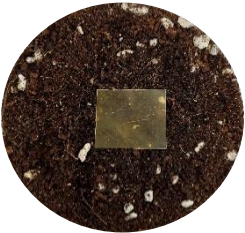   | $38.69 \pm 1.48\%$<br>  | $68.69 \pm 5.76\%$<br>  | $71.32 \pm 4.26\%$<br>  |
| Pectin                  | 0%<br>   | $100.00 \pm 0.00\%$<br> | $100.00 \pm 0.00\%$<br> | $100.00 \pm 0.00\%$<br> |
| PLA                     | 0%<br> | $1.89 \pm 1.28\%$<br> | $3.36 \pm 2.79\%$<br> | $6.82 \pm 0.87\%$<br> |
